# Supplementary material
Source: publisher figshare collection journal article supplement (https://asha.figshare.com/articles/dataset/_/14226737)
Supplement: Supplementary file 1 [file 1]

## Supplemental Material S1. Scores for each participant for each rater.

### Individual Scores for Each Participant: Rater 1

| Participant # | Time 1 Transcription | Time 1 Multiple Choice | Time 2 Transcription | Time 2 Multiple Choice |
|---------------|----------------------|------------------------|----------------------|------------------------|
| P1            | 60                   | 78                     | 62                   | 80                     |
| P2            | 2                    | 44                     | 4                    | 34                     |
| P3            | 2                    | 14                     | 2                    | 12                     |
| P4            | 72                   | 86                     | 44                   | 74                     |
| P5            | 52                   | 74                     | 42                   | 56                     |
| P6            | 76                   | 86                     | 76                   | 86                     |
| P7            | 90                   | 92                     | 84                   | 88                     |
| P8            | 94                   | 94                     | 96                   | 98                     |
| P9            | 20                   | 60                     | 12                   | 32                     |
| P10           | 78                   | 84                     | 82                   | 96                     |
| P11           | 40                   | 64                     | 34                   | 64                     |
| P12           | 48                   | 58                     | 62                   | 80                     |
| P13           | 46                   | 62                     | 56                   | 74                     |
| P14           | 50                   | 76                     | 52                   | 74                     |
| P15           | 48                   | 72                     | 58                   | 76                     |
| P16           | 90                   | 96                     | 84                   | 92                     |
| P17           | 0                    | 10                     | 0                    | 8                      |
| P18           | 92                   | 98                     | 82                   | 94                     |
| P19           | 4                    | 6                      | 2                    | 10                     |
| P20           | 4                    | 24                     | 0                    | 22                     |
| P21           | 44                   | 68                     | 44                   | 68                     |
| P22           | 44                   | 76                     | 64                   | 78                     |
| P23           | 76                   | 84                     | 82                   | 94                     |
| P24           | 26                   | 66                     | 34                   | 70                     |
| P25           | 90                   | 96                     | 94                   | 98                     |
| P26           | 0                    | 10                     | 0                    | 12                     |
| P27           | 58                   | 76                     | 48                   | 68                     |
| P28           | 0                    | 12                     | 0                    | 8                      |

Individual Scores for Each Participant: Rater 2

| <b>Participant #</b> | <b>Time 1 Transcription</b> | <b>Time 1 Multiple Choice</b> | <b>Time 2 Transcription</b> | <b>Time 2 Multiple Choice</b> |
|----------------------|-----------------------------|-------------------------------|-----------------------------|-------------------------------|
| P1                   | 56                          | 74                            | 70                          | 80                            |
| P2                   | 4                           | 44                            | 6                           | 34                            |
| P3                   | 4                           | 18                            | 4                           | 8                             |
| P4                   | 72                          | 86                            | 48                          | 84                            |
| P5                   | 52                          | 70                            | 42                          | 56                            |
| P6                   | 62                          | 82                            | 76                          | 86                            |
| P7                   | 88                          | 92                            | 86                          | 90                            |
| P8                   | 92                          | 92                            | 94                          | 96                            |
| P9                   | 44                          | 66                            | 10                          | 30                            |
| P10                  | 76                          | 82                            | 82                          | 96                            |
| P11                  | 38                          | 64                            | 32                          | 54                            |
| P12                  | 60                          | 70                            | 64                          | 80                            |
| P13                  | 44                          | 58                            | 62                          | 72                            |
| P14                  | 58                          | 78                            | 54                          | 74                            |
| P15                  | 54                          | 76                            | 50                          | 64                            |
| P16                  | 90                          | 96                            | 86                          | 96                            |
| P17                  | 0                           | 10                            | 0                           | 14                            |
| P18                  | 86                          | 98                            | 84                          | 92                            |
| P19                  | 4                           | 6                             | 0                           | 10                            |
| P20                  | 10                          | 20                            | 4                           | 14                            |
| P21                  | 50                          | 68                            | 44                          | 68                            |
| P22                  | 60                          | 84                            | 60                          | 88                            |
| P23                  | 74                          | 86                            | 76                          | 90                            |
| P24                  | 36                          | 58                            | 34                          | 58                            |
| P25                  | 88                          | 96                            | 92                          | 100                           |
| P26                  | 0                           | 6                             | 2                           | 4                             |
| P27                  | 60                          | 68                            | 52                          | 64                            |
| P28                  | 0                           | 16                            | 0                           | 8                             |

### Individual Scores for Each Participant: Rater 3

| <b>Participant #</b> | <b>Time 1 Transcription</b> | <b>Time 1 Multiple Choice</b> | <b>Time 2 Transcription</b> | <b>Time 2 Multiple Choice</b> |
|----------------------|-----------------------------|-------------------------------|-----------------------------|-------------------------------|
| P1                   | 54                          | 74                            | 62                          | 74                            |
| P2                   | 2                           | 38                            | 6                           | 34                            |
| P3                   | 2                           | 14                            | 2                           | 10                            |
| P4                   | 68                          | 90                            | 50                          | 80                            |
| P5                   | 50                          | 74                            | 48                          | 64                            |
| P6                   | 82                          | 90                            | 84                          | 90                            |
| P7                   | 90                          | 98                            | 88                          | 90                            |
| P8                   | 92                          | 94                            | 92                          | 98                            |
| P9                   | 26                          | 54                            | 8                           | 20                            |
| P10                  | 74                          | 84                            | 78                          | 90                            |
| P11                  | 30                          | 64                            | 30                          | 64                            |
| P12                  | 58                          | 74                            | 62                          | 78                            |
| P13                  | 42                          | 66                            | 58                          | 76                            |
| P14                  | 46                          | 74                            | 46                          | 82                            |
| P15                  | 56                          | 72                            | 54                          | 72                            |
| P16                  | 90                          | 94                            | 84                          | 98                            |
| P17                  | 0                           | 10                            | 0                           | 20                            |
| P18                  | 88                          | 98                            | 74                          | 94                            |
| P19                  | 6                           | 28                            | 0                           | 14                            |
| P20                  | 8                           | 24                            | 4                           | 18                            |
| P21                  | 46                          | 66                            | 42                          | 70                            |
| P22                  | 46                          | 76                            | 52                          | 82                            |
| P23                  | 70                          | 82                            | 80                          | 90                            |
| P24                  | 30                          | 60                            | 38                          | 64                            |
| P25                  | 94                          | 100                           | 86                          | 98                            |
| P26                  | 0                           | 14                            | 0                           | 14                            |
| P27                  | 52                          | 68                            | 38                          | 62                            |
| P28                  | 0                           | 16                            | 0                           | 14                            |
