# Supplementary material
Source: publisher figshare collection journal article supplement (https://asha.figshare.com/articles/dataset/_/14226737)
Supplement: Supplementary file 2 [file 1]

**Supplemental Material S2.** Differences in raters’ intelligibility scores.

|                    | <b>Mean %<br/>Difference<br/>R1-R2</b> | <b>Mean %<br/>Difference<br/>R1-R3</b> | <b>Mean %<br/>Difference<br/>R2-R3</b> | <b>Mean %<br/>Difference<br/>Across<br/>Raters</b> | <b><i>SD</i><br/>Difference<br/>Across<br/>Raters</b> | <b>Min-Max<br/>Difference<br/>Across<br/>Raters</b> |
|--------------------|----------------------------------------|----------------------------------------|----------------------------------------|----------------------------------------------------|-------------------------------------------------------|-----------------------------------------------------|
| Transcription      |                                        |                                        |                                        |                                                    |                                                       |                                                     |
| Time 1             | 4.7                                    | 3.6                                    | 4.6                                    | 4.3                                                | .6                                                    | 0-24                                                |
| Time 2             | 2.5                                    | 3.8                                    | 3.9                                    | 3.4                                                | .8                                                    | 0-14                                                |
|                    |                                        |                                        |                                        |                                                    |                                                       |                                                     |
| Multiple<br>Choice |                                        |                                        |                                        |                                                    |                                                       |                                                     |
| Time 1             | 3.1                                    | 3.7                                    | 4.4                                    | 3.7                                                | .7                                                    | 0-22                                                |
| Time 2             | 3.7                                    | 4.2                                    | 4.5                                    | 4.1                                                | .4                                                    | 0-12                                                |

*Note.* R = rater.
